# Supplementary material
Source: publisher figshare collection journal article supplement (https://frontiersin.figshare.com/ndownloader/files/28222533)
Supplement: Supplementary file 1 [file 28222533]

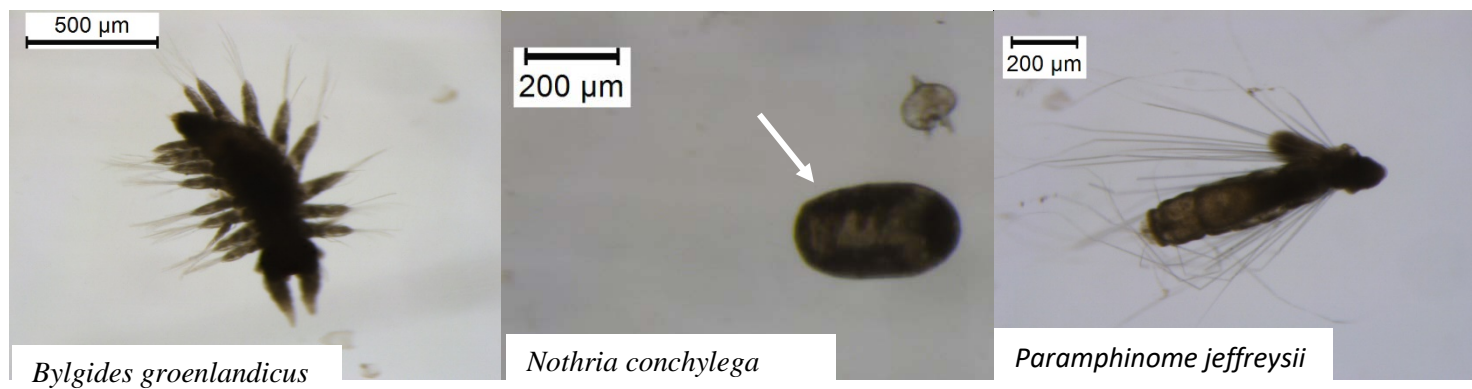

**Supplementary Image 1:** Photographs of planktonic stages of benthic invertebrates for which a planktonic stage had not previously been recorded.
